# Supplementary material for: Early warning signals of malaria resurgence in Kericho, Kenya
Source: PubMed Central journal article supplement (PMC7115183; doi:10.1098/rsbl.2019.0713), 2020-03-18
Supplement: rsbl20190713supp3.pdf [file rsbl20190713supp3.pdf]

## Early Warning Signals of Malaria Resurgence in Kericho, Kenya

Mallory J. Harris, Simon I. Hay, and John M. Drake

### Supplemental File 3: Using Spearman's Correlation Coefficient ( $\rho$ )

This supplement examines the sensitivity of the main result to the correlation coefficient used to quantify the increase in each indicator over time. Kendall's  $\tau$  is generally used in early warning signal detection and therefore used in the main text. Pearson correlation coefficient ( $r$ ) is unsuitable for these analyses, as it quantifies the strength of linear relationships instead of monotonic relationships (compared to Kendall's  $\tau$  and Spearman's  $\rho$ ). By repeating the analyses using Spearman's correlation coefficient ( $\rho$ ), we found that analyses based on Spearman's  $\rho$  generally returned slightly less significant signals, although our results are robust to choice of correlation coefficient (Supplemental Figure 3). The data for these analyses are available at <https://github.com/mjharris95/Kericho-EWS>.

# Early Warning Signals of Malaria Resurgence in Kericho, Kenya

Mallory J. Harris, Simon I. Hay, and John M. Drake

*Biology Letters*

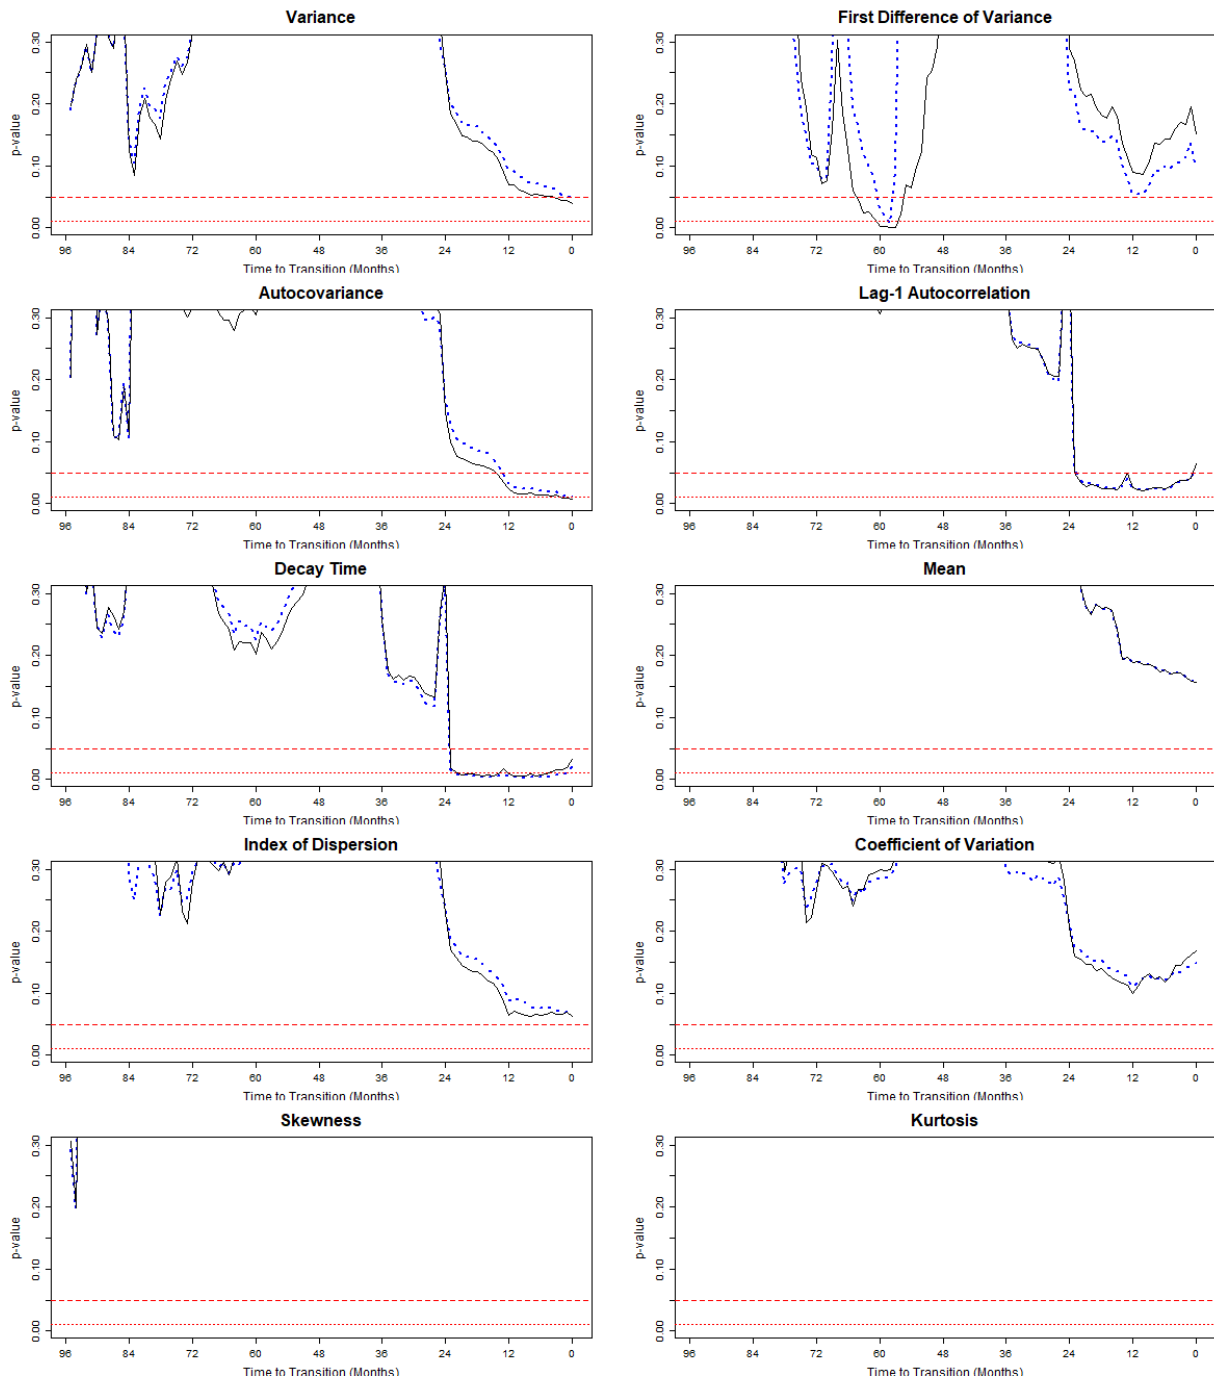

*Supplemental Figure 3: Analogous to figure 3, these plots give the p-value of each signal, computed monthly starting in April 1985, 96 months prior to the notional month of critical transition, April 1993. The red horizontal lines indicate p-values of .05 and .01 for reference. The solid black lines give the signal based on Kendall's  $\tau$  and the dashed blue lines give the signal based on Spearman's  $\rho$*
